# Supplementary material for: Structure of the SthK Carboxy-Terminal Region Reveals a Gating Mechanism for Cyclic Nucleotide-Modulated Ion Channels
Source: PubMed Central journal article supplement (PMC4308110; doi:10.1371/journal.pone.0116369), 2015-01-27
Supplement: pone.0116369.s003.pdf [file pone.0116369.s003.pdf]

cAMP-bound SthK-C<sub>term</sub> space group *P4*

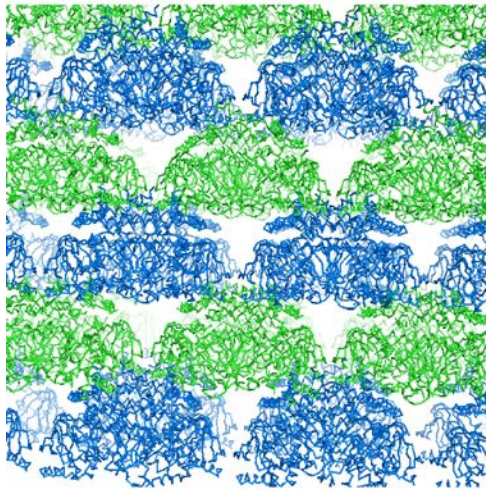

90°  
↻

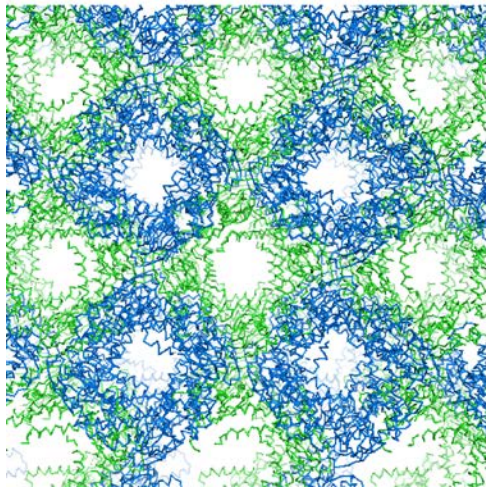

cGMP-bound SthK-C<sub>term</sub> space group *I4*

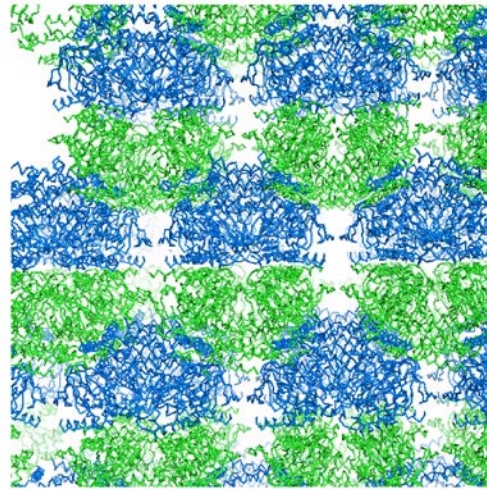

90°  
↻

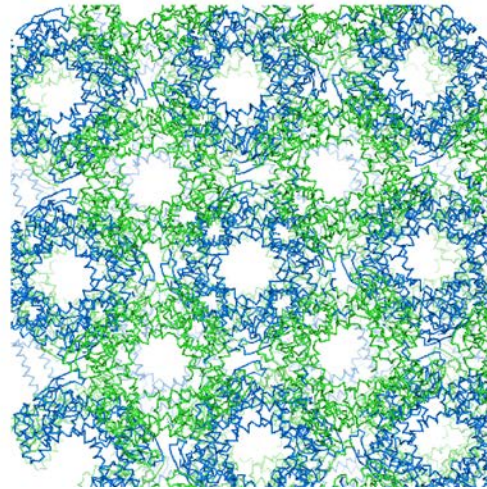

**Figure S3. Comparison of the crystal packing for the two different crystal forms of SthK-C<sub>term</sub> in complex with cAMP or cGMP.**

Chain A is colored in blue, chain B in green. In the cAMP-bound crystal form, different tetramers are stacked in a head-to-tail arrangement. In the cGMP-bound crystal form different tetramers are stacked in a tail-to-tail arrangement.
